# Supplementary material
Source: Springer Nature journal article supplement (https://www.springermedizin.de/resource/supplementary/13058_2010_9487_MOESM7_ESM.pdf/9702268)

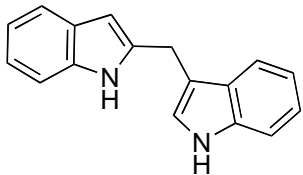

2,3'-DIM

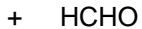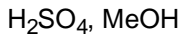

reflux, 1 h

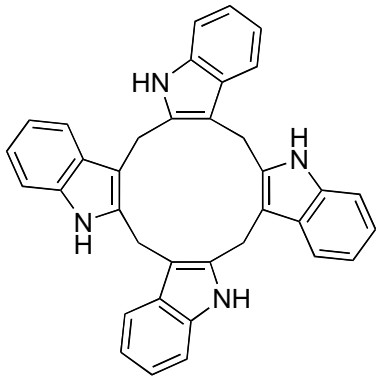

CTet

Supplement: MOESM7 [file 9702268]
